# Supplementary material for: Ternary nanocomposites of CdS/WO3/g-C3N4 for hydrogen production
Source: Royal Society of Chemistry journal article supplement (doi:10.1039/d2cp04617b), 2022-12-20
Supplement: d2cp04617b1.pdf [file d2cp04617b1.pdf]

## **Ternary Nanocomposites of CdS/WO<sub>3</sub>/g-C<sub>3</sub>N<sub>4</sub> for Hydrogen Production**

S.V. Prabhakar Vattikuti<sup>a,\*</sup>, K.C. Devarayapalli<sup>a</sup>, Jie Zeng<sup>a</sup>, Jaesool Shim<sup>a,\*</sup>, Nam Nguyen Dang<sup>b,c,\*</sup>

<sup>a</sup>School of Mechanical Engineering, Yeungnam University, Gyeongsan-38541, Republic of Korea.

<sup>b</sup>Future Materials & Devices Lab., Institute of Fundamental and Applied Sciences, Duy Tan University, Ho Chi Minh City 700000, Viet Nam

<sup>c</sup>The Faculty of Environmental and Chemical Engineering, Duy Tan University, Danang 550000, Viet Nam

\* Email addresses: vsyprabu@gmail.com (SVPV), jshim@ynu.ac.kr (JS), nguyendangnam@duytan.edu.vn (NND)

### **1.1 Characterization of the catalysts**

X-ray diffraction (XRD) analysis of the catalysts was carried out using a PANalytical diffractometer with Ni-filtered Cu K $\alpha$  radiation ( $\lambda = 1.5406 \text{ \AA}$ ) at a scan rate of  $10^\circ/\text{min}$  and a beam current and voltage of 30 mA and 50 kV, respectively. For transmission electron microscopy (TEM) and high-resolution TEM (HRTEM) measurements, all samples were sonicated using a C<sub>2</sub>H<sub>5</sub>OH solution and suspended on a copper grid (400-mesh, with 3.5-mm diameter) with a high-resolution transmission electron microscope (H-7600; Hitachi Inc., Japan) accelerating 120 kV microscope. The binding energies of all synthesized samples were tested as referenced to C 1s at 284.7 eV. A scanning electron microscope (SEM) (SEM HITACHI S-4800) was used for the microstructural and surface morphology characterizations. The N<sub>2</sub> adsorption-desorption isotherms were measured using a Micromeritics ASAP 2420 surface area analyzer. Before gas adsorption, the samples were degassed at 150 °C for 3h. The chemical valences of elements were analyzed by X-ray photoelectron spectra (XPS) using a Thermo Scientific k- $\alpha$  surface analyzer equipped with a AlK $\alpha$  X-ray source ( $h\nu = 1486 \text{ eV}$ ) using C 1s (284.5 eV) as a reference to calibrate binding energies. The ultra-violet-visible (UV-Vis) spectroscopy was carried out on a Cary 5000 apparatus in the 200 – 800 nm wavelength.

## 1.2 Photocatalytic test

The photocatalytic hydrogen production experiment was conducted in a quartz flask (150 mL) containing 10 mg of catalyst and certain amount of  $\text{H}_2\text{PtCl}_6 \cdot 6\text{H}_2\text{O}$  (3 wt% Pt relative to the catalyst) as co-catalyst were added in 45 mL of DI water, 5 mL of TEOA as a sacrificial agent, and at room temperature. The opening of the flask was airtight with a silicone rubber septum. A Xenon light source ( $\lambda > 420$  nm, 300 W MAX-303 model) was used as the light source. Before illuminations, the system was evacuated and bubbled with  $\text{N}_2$  for 30 min to remove the dissolved air molecules. The  $\text{H}_2$  gas evolved was estimated using an off-line gas chromatograph (YL-6500 instrument) equipped with a thermal conductivity detector (TCD) and He is a carrier gas. Photocatalytic tests were performed with 20 mg of as-prepared photocatalysts suspended in 100 mL of dye aqueous solution with the concentration of MG dye of 5 mg/L under visible light irradiation. Before conducting the photocatalytic test, the mixture was stirred in the dark for 30 min to obtain the adsorption-desorption equilibrium. Under illuminations, at certain time intervals, 3-mL solution was collected from the reactor and centrifuged and then tested by using UV-Visible spectroscopy.

## 1.3 Electrochemical measurements

The photocurrent was measured and electron impedance spectroscopy (EIS) was performed using a three-electrode cell in which Ag/AgCl was employed as the reference electrode and a platinum coil was used as the counter electrode at an ambient temperature. A fluorine doped Tin oxide (FTO) glass substrate was used as the working electrode. The preparation method of the working electrode was as follows: 10 mg of the sample was mixed with 450  $\mu\text{L}$  of DI water and 50  $\mu\text{L}$  of Nafion to create a slurry which was applied on the ITO glass substrate using a drop-casting method. Then, the working electrode was heated to 90 °C for overnight. The photocurrent measurements were conducted using a 300-W Xenon lamp with 80  $\text{mW}/\text{cm}^2$  of light intensity. EIS was performed over a frequency of from 100 MHz to 1 MHz at the open

circuit. All the electrochemical experiments were performed on an SP-200 Bio-logic workstation in 0.5 Na<sub>2</sub>SO<sub>4</sub>.

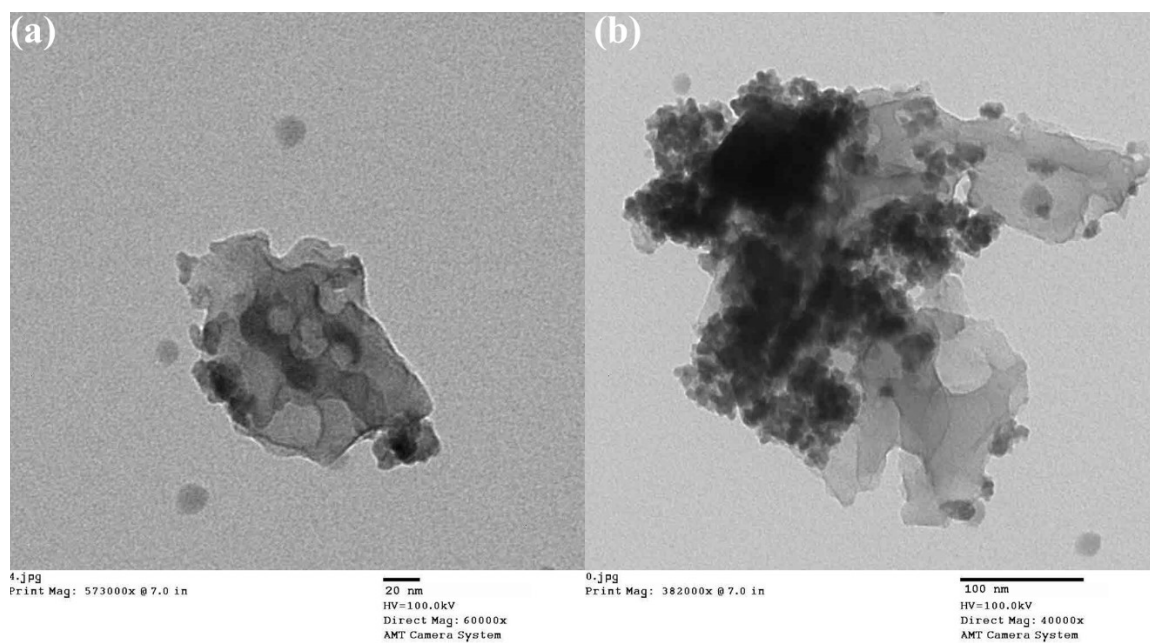

Fig. S1 HRTEM images of (a) CN and (b) CNW catalysts.

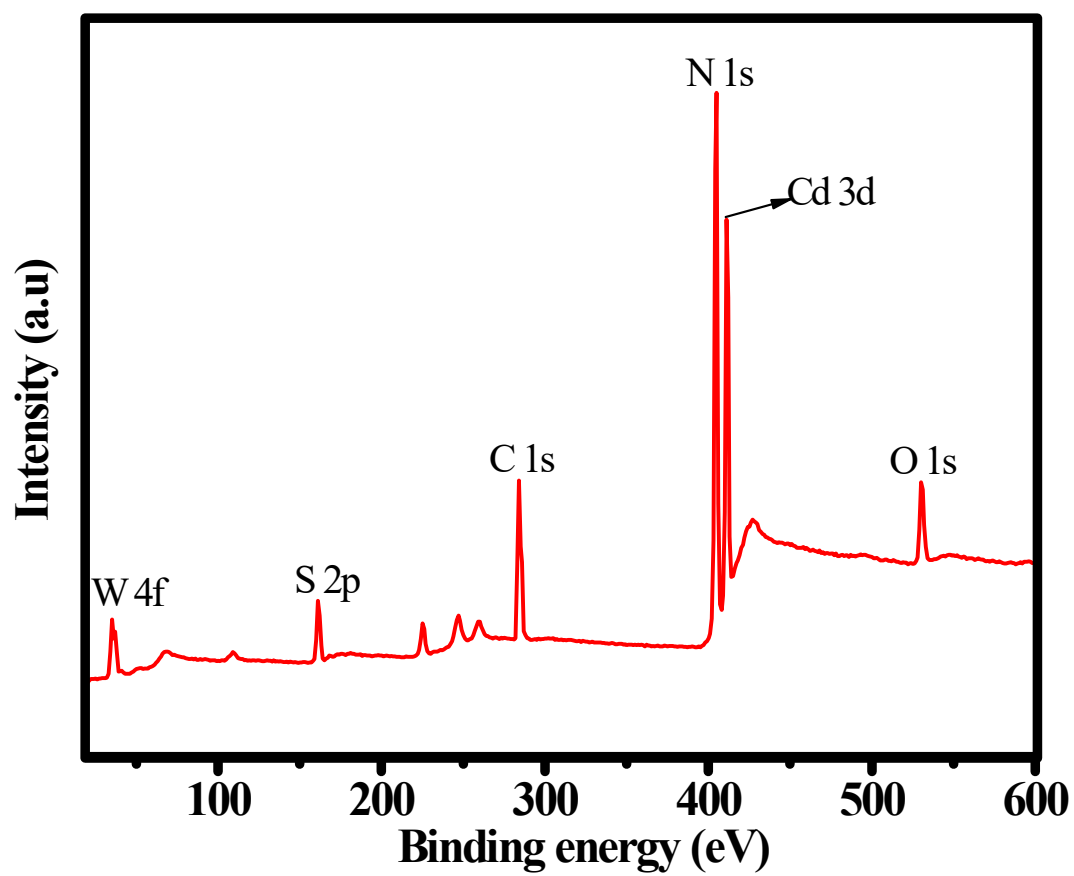

Fig. S2 XPS survey of 3C-CNW nanostructure catalyst.

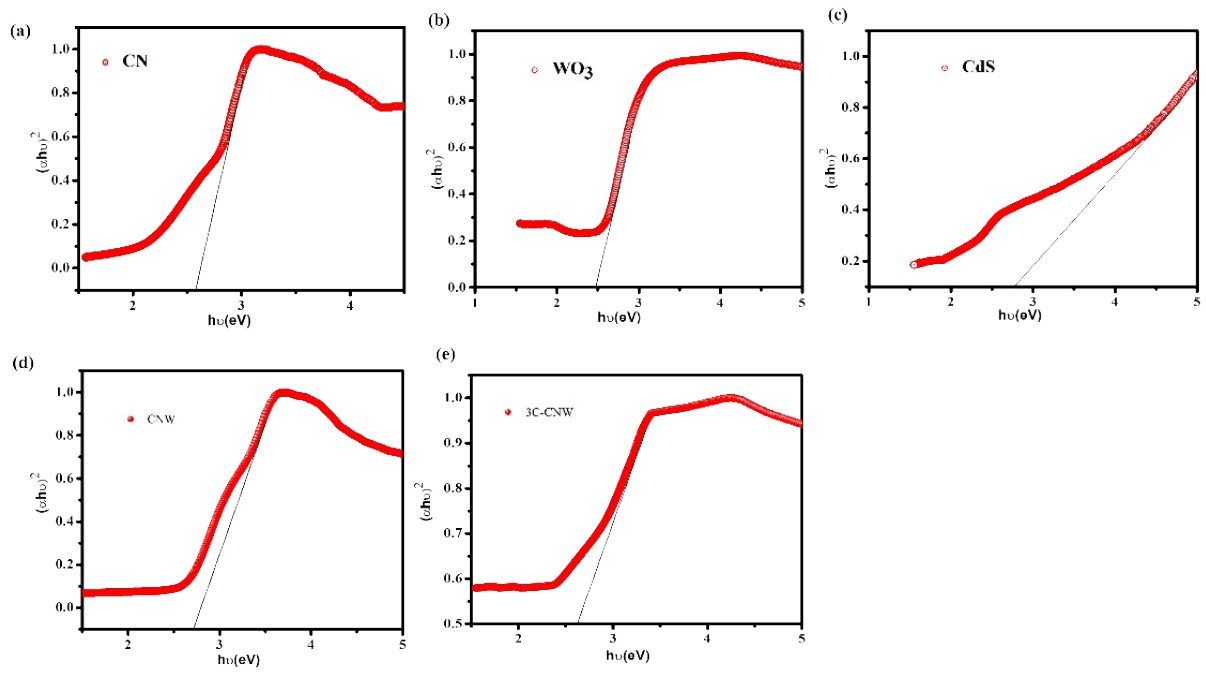

Fig. S3 (a-e) Estimated band gaps from Tauc plots of CN, WO<sub>3</sub>, CdS, CNW and 3C-CNW samples.

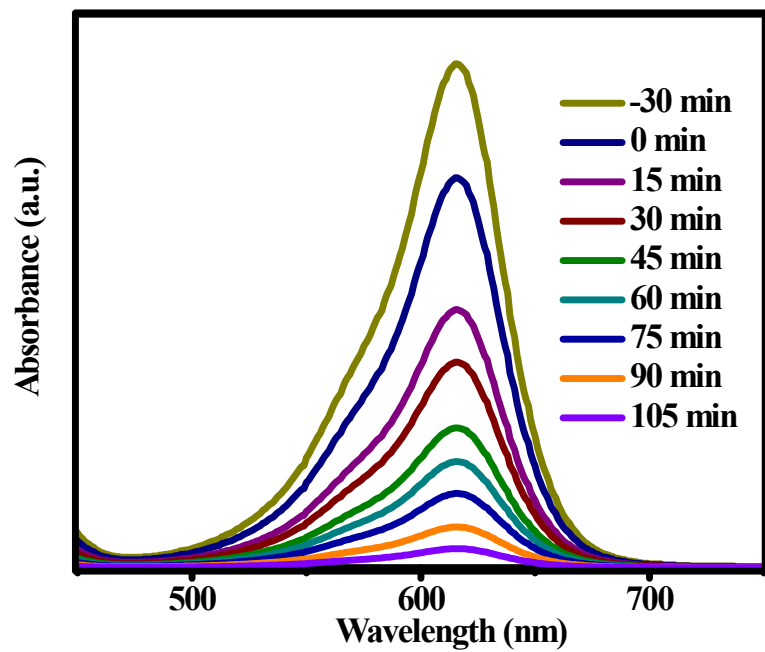

Fig. S4 UV-Vis absorption spectra of 3C-CNW nanostructure over MG dye under visible light irradiation.

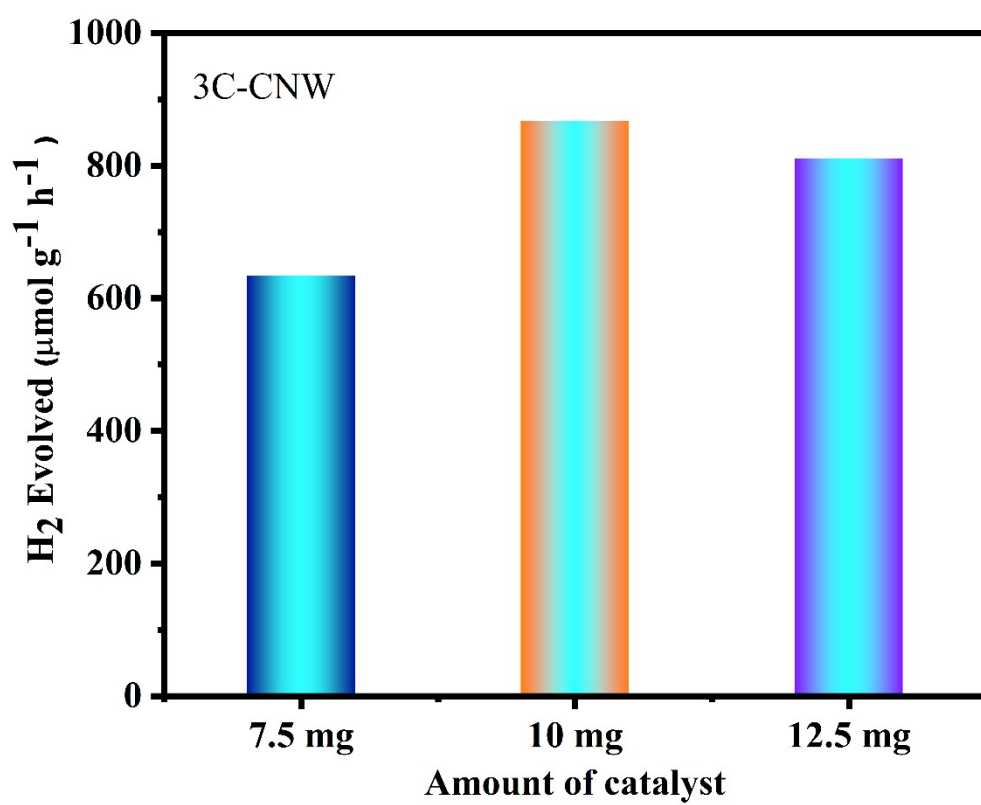

Fig. S5 Influence of amount of catalysts over 3C-CNW nanostructure catalyst.

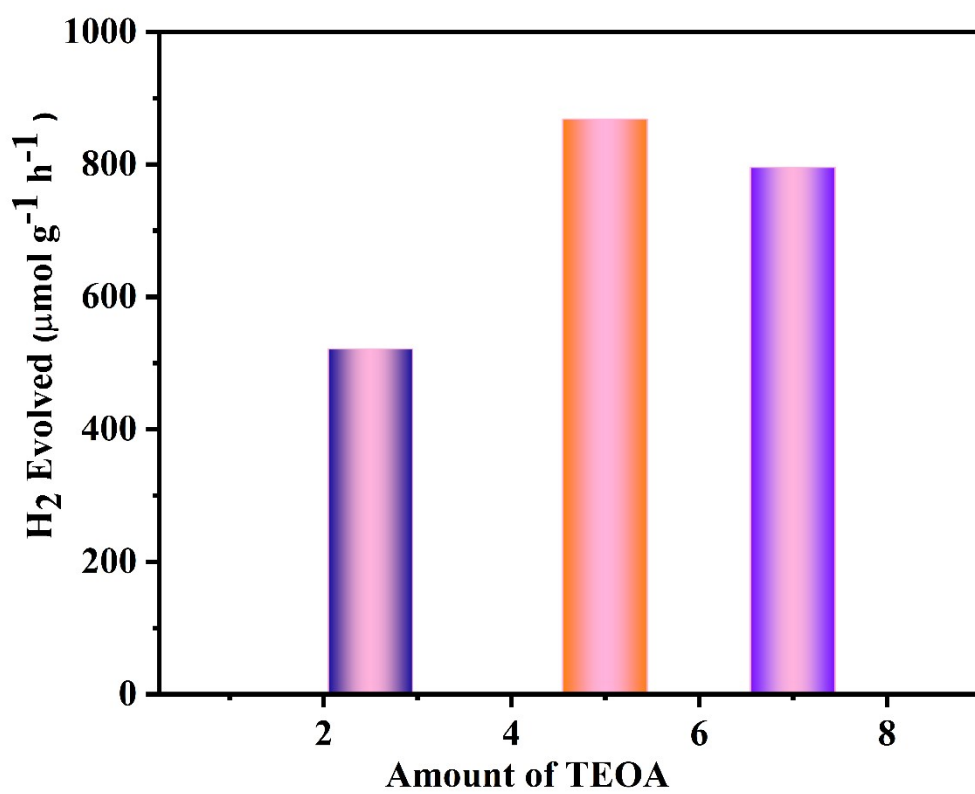

Fig. S6 Comparison of H<sub>2</sub> generation rate with different amount of TEOA scavenger over 3C-CNW nanostructure catalyst.



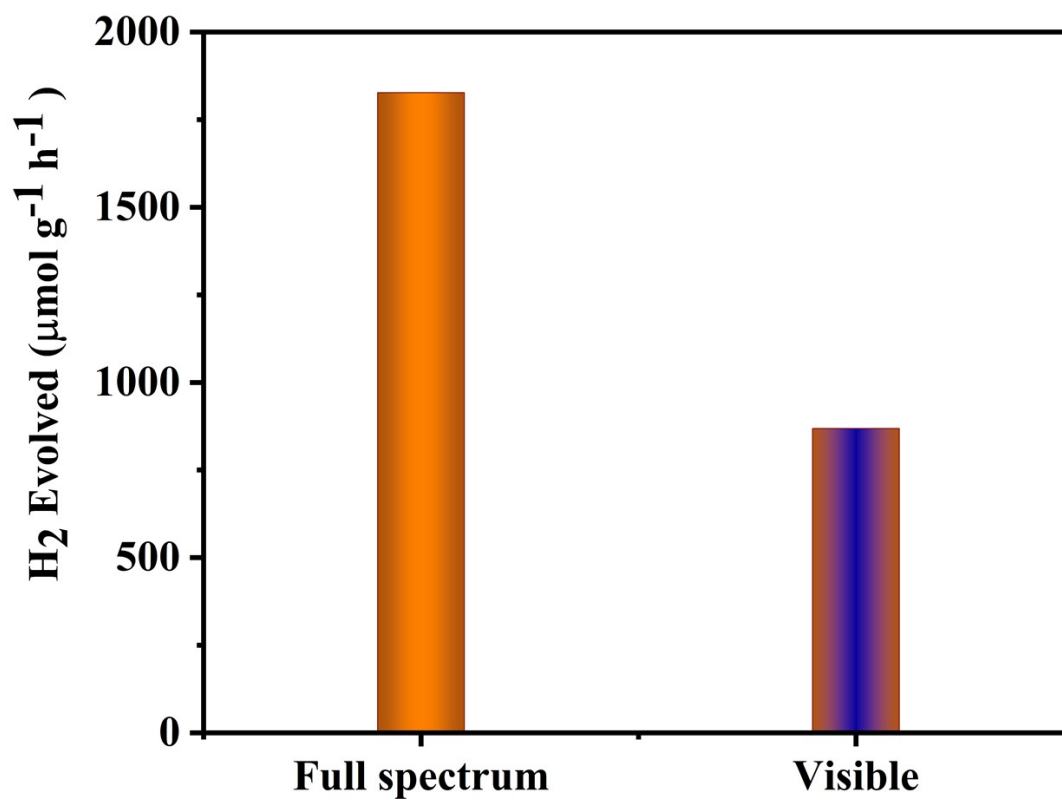

**Fig. S7** amount of H<sub>2</sub> generated over 3C-CNW nanostructure under visible light ( $\lambda > 420$  nm) and full spectrum light [with same light intensity: 80 mW/cm<sup>2</sup>, light type: MAX 303, 300 W].

**Table 1** Comparison of photocatalytic H<sub>2</sub> generation rate over g-C<sub>3</sub>N<sub>4</sub> based photocatalysts

| Photocatalyst (Co-catalyst)                                             | Sacrificing agent                         | Light source*        | H <sub>2</sub> production rate              | Reference    |
|-------------------------------------------------------------------------|-------------------------------------------|----------------------|---------------------------------------------|--------------|
| Bulk-g-C <sub>3</sub> N <sub>4</sub>                                    | TEOA, Pt as cocatalyst                    | 300W, >420 nm        | 10.7 μmol h <sup>-1</sup>                   | [1]          |
| TiO <sub>2</sub> /MoS <sub>2</sub> /graphene (0.5%)                     | 25 vol% EtOH/H <sub>2</sub> O             | 350 W, Xe lamp       | 2066 μmol g <sup>-1</sup> h <sup>-1</sup>   | [2]          |
| g-C <sub>3</sub> N <sub>4</sub> /TiO <sub>2</sub>                       | 100 mL of TEOA, 3 wt.% Pt as a cocatalyst | 300W, Xe λ>420nm     | 40 μmol h <sup>-1</sup>                     | [3]          |
| CdS/g-C <sub>3</sub> N <sub>4</sub>                                     | Methanol, Pt as cocatalyst                | Xe lamp (λ > 400 nm) | 172.7 μmol g <sup>-1</sup> h <sup>-1</sup>  | [4]          |
| MoS <sub>2</sub> /CdS/TiO <sub>2</sub> (1%)                             | 10 vol% lactic acid                       | 300 W, Xe lamp       | 280 μmol h <sup>-1</sup>                    | [5]          |
| Black TiO <sub>2</sub> /MoS <sub>2</sub> /TiO <sub>2</sub>              | 20 vol% methanol/H <sub>2</sub> O         | 300 W, Xe lamp       | 560 μmol g <sup>-1</sup> h <sup>-1</sup>    | [6]          |
| CdS/MOS <sub>2</sub> /graphene                                          | 20 vol% lactic acid                       | 300 W, Xe lamp       | 1.8 mmol h <sup>-1</sup>                    | [7]          |
| Meso-TiO <sub>2</sub> /g-C <sub>3</sub> N <sub>4</sub>                  | Methanol, Pt as cocatalyst                | Xe lamp (λ > 420 nm) | 983.56 μmol g <sup>-1</sup> h <sup>-1</sup> | [8]          |
| NGQDs-Zn/C <sub>3</sub> N <sub>4</sub>                                  | Methanol, Pt as cocatalyst                | Xe lamp (λ > 420 nm) | 340.9 μmol g <sup>-1</sup> h <sup>-1</sup>  | [9]          |
| Ti <sub>3</sub> C <sub>2</sub> (TiO <sub>2</sub> )/CdS/MoS <sub>2</sub> | -                                         | 300W, Xe lamp        | 317 μmol g <sup>-1</sup> h <sup>-1</sup>    | [10]         |
| Pt/g-C <sub>3</sub> N <sub>4</sub> nanowire bundles (CN NWB)            | -                                         | Xe, >420 nm          | 3.6 μmol h <sup>-1</sup>                    | [11]         |
| MoS <sub>2</sub> /g-C <sub>3</sub> N <sub>4</sub>                       | TEOA                                      | Xe lamp (λ > 400 nm) | 252 μmol g <sup>-1</sup> h <sup>-1</sup>    | [12]         |
| CN                                                                      | 5 vol%TEOA, Pt-cocatalyst                 | 300 W, Xe >420 nm    | 12.6 μmol g <sup>-1</sup> h <sup>-1</sup>   | Current work |
| CNW                                                                     | 5 vol%TEOA, Pt-cocatalyst                 | 300 W, Xe >420 nm    | 248.06 μmol g <sup>-1</sup> h <sup>-1</sup> | Current work |
| 3C-CNW                                                                  | 5 vol%TEOA, Pt-cocatalyst                 | 300 W, Xe >420 nm    | 868.23 μmol g <sup>-1</sup> h <sup>-1</sup> | Current work |

TEOA is triethanolamine.

## References

- [1] X. Wang, K. Maeda, X. Chen, K. Takane, K. Domen, Y. Hou, X. Fu and M. Antonietti, polymer semiconductors for artificial photosynthesis: Hydrogen evolution by mesoporous graphitic carbon nitride with visible light, *J. Am. Chem. Soc.* 131 (2009) 1680–1681.
- [2] Q. Xiang, J. Yu and M. Jaroniec, Synergetic effect of MoS<sub>2</sub> and graphene as cocatalysts for enhanced photocatalytic H<sub>2</sub> production activity of TiO<sub>2</sub> nanoparticles, *J. Am. Chem. Soc.*, 2012, 134, 6575–6578.
- [3] H. Zhang, F. Liu, H. Wu, X. Cao, J. Sun, W. Lei, In situ synthesis of g-C<sub>3</sub>N<sub>4</sub>/TiO<sub>2</sub> heterostructures with enhanced photocatalytic hydrogen evolution under visible light. *RSC Adv.* 7 (2017) 40327–40333.
- [4] L. Ge, F. Zuo, J. Liu, Q. Ma, C. Wang, D. Sun, L. Bartels, P. Feng, Synthesis and efficient visible light photocatalytic hydrogen evolution of polymeric g-C<sub>3</sub>N<sub>4</sub> coupled with CdS quantum dots, *J. Phys. Chem. C*, 116 (2012)13708–13714.
- [5] Mingxuan Sun, Ying Wang, Yalin Fang, Shanfu Sun, Zhishui Yu, Construction of MoS<sub>2</sub>/CdS/TiO<sub>2</sub> ternary composites with enhanced photocatalytic activity and stability, *Journal of Alloys and Compounds* 684 (2016) 335-341.
- [6] Xuefeng Liu, Prof. Zipeng Xing, Hang Zhang, Wenmei Wang, Yan Zhang, Prof. Zhenzi Li, Prof. Xiaoyan Wu, Prof. Xiujuan Yu, Prof. Wei Zhou, Fabrication of 3 D mesoporous black TiO<sub>2</sub>/MoS<sub>2</sub>/TiO<sub>2</sub> nanosheets for visible-light-driven photocatalysis, *Chem. Sus. Chem*, 9 (2016) 1118-1124.
- [7] Kun Chang, Zongwei Mei, Tao Wang, Qing Kang, Shuxin Ouyang, and Jinhua Ye MoS<sub>2</sub>/Graphene cocatalyst for efficient photocatalytic H<sub>2</sub> evolution under visible light irradiation, *ACS Nano* 8 (2014) 7078–7087.
- [8] X. Yu, X. Fan, L. An, G. Liu, Z. Li, J. Liu, P. Hu, Mesocrystalline Ti<sub>3</sub>C<sub>2</sub>-TiO<sub>2</sub> hybridized g-C<sub>3</sub>N<sub>4</sub> for efficient visible-light photocatalysis, *Carbon* 128 (2018) 21-30.
- [9] M. Yan, Y. Hua, F. Zhu, L. Sun, W. Gu, W. Shi, Constructing nitrogen doped graphene quantum dots-ZnNb<sub>2</sub>O<sub>6</sub>/g-C<sub>3</sub>N<sub>4</sub> catalysts for hydrogen production under visible light *Applied Catalysis B: Environmental* 206 (2017) 531–537.
- [10] Yong-Jun Yuan, Yan Yang, Zijian Li, Daqin Chen, Shiting Wu, Gaoliang Fang, Wangfeng Bai, Mingye Ding, Ling-Xia Yang, Da-Peng Cao, Zhen-Tao Yu, and Zhi-Gang Zou, Promoting Charge Separation in g-C<sub>3</sub>N<sub>4</sub>/Graphene/MoS<sub>2</sub> Photocatalysts by Two-Dimensional Nanojunction for Enhanced Photocatalytic H<sub>2</sub> Production, *ACS Appl. Energy Mater.* 1 (2018) 1400–1407.

- [11] G. Zhang, Z. Lan, X. Wang, Conjugated polymers: Catalysts for photocatalytic hydrogen evolution, *Angewandte Chemie*, 55 (2016) 15712-15727.
- [12] H. Zhao, Y. Dong, P. Jiang, H. Miao, G. Wang, J. Zhang, In situ light-assisted preparation of MoS<sub>2</sub> on graphitic C<sub>3</sub>N<sub>4</sub> nanosheets for enhanced photocatalytic H<sub>2</sub> production from water, *J. Mater. Chem. A*, 3 (2015) 7375-7381.
